# Supplementary material
Source: Springer Nature journal article supplement (https://www.springermedizin.de/resource/supplementary/12875_2013_1011_MOESM4_ESM.pdf/9435924)

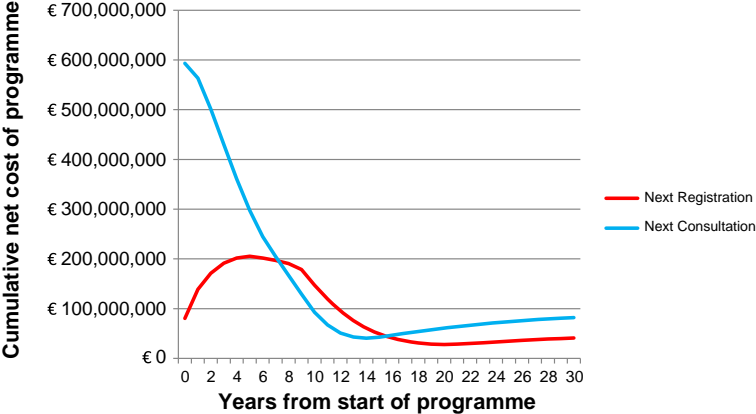

Supplement: MOESM4 [file 9435924]
